# Supplementary material for: „Warum wird der Notruf 112 gewählt?“ – Befragung zum Notrufverhalten der Berliner Bevölkerung
Source: Springer Nature journal article supplement (doi:10.1007/s10049-021-00954-1), 2021-11-03
Supplement: MOESM1 [file 19826790]

Zusatzmaterial zum Beitrag „Warum wird der Notruf 112 gewählt?“ – Befragung zum Notrufverhalten der Berliner Bevölkerung“ von Dahmen J, Brettschneider P, Poloczek S et al. (2021) in *Notfall+Rettungsmedizin*.

Beitrag und Zusatzmaterial stehen Ihnen auf [www.springermedizin.de](http://www.springermedizin.de) zur Verfügung. Bitte geben Sie dort den Beitragstitel in die Suche ein.

## Fragebogen Telefonumfrage

1) Was fällt Ihnen spontan zur Telefonnummer 112 ein? (ohne Antwortvorgaben, Mehrfachnennungen möglich)

2) Die “112” ist eine telefonische Notrufnummer. Haben Sie die “112” in Berlin schon mal gewählt?

☐ ja, schon gewählt

☐ nein, noch nicht gewählt

3) Wie wurde Ihnen da geholfen? Würden Sie sagen...?

☐ sehr gut

☐ eher gut

☐ eher nicht gut

☐ gar nicht gut

4) Was wissen Sie über die telefonische Notrufnummer “112”, wann sollte sie gewählt werden? Würden Sie sagen... (Mehrfachantworten möglich)

☐ bei einer lebensbedrohlichen medizinischen Situation

☐ bei einem Brand, der nicht selbst gelöscht werden kann

☐ bei akuten gesundheitlichen Problemen, auch wenn diese nicht lebensbedrohlich sind

☐ bei nicht-akuten gesundheitlichen Beschwerden außerhalb der Öffnungszeiten von Arztpraxen

5) Ich nenne Ihnen nun einige Aussagen zur Notrufnummer “112” und Sie sagen mir bitte, ob diese Aussage auf Sie zutrifft oder nicht. Wie ist das mit... (mehrfach Antworten möglich)

☐ Ich rufe die 112 nur im Ausnahmefall an, wenn ich mit einem gesundheitlichen Problem wirklich nicht mehr weiter weiß

- ☐ Ich rufe die 112 nur bei Lebensgefahr an, wenn ich mir wirklich nicht mehr selbst helfen oder zu einem Arzt/ Krankenhaus fahren kann
- ☐ Ich zahle so wie andere Menschen Steuern, da darf man dann auch mal
- ☐ Der Hausarzt hat nachts und am Wochenende zu, Taxis sind teuer
- ☐ Wenn mir ein gesundheitliches Problem eines Angehörigen über den Kopf wächst

### **Wissen über Alternativen zum Notruf**

6) Wenn bei Ihnen oder einer anderen Person ein medizinisches Problem vorliegt, das dringend, aber nicht lebensbedrohlich ist, kennen Sie zum Notruf "112" alternative Notrufnummern?

- ☐ Ja
- ☐ Nein

7) Würden Sie mir bitte diese alternativen Notrufnummern nennen, die Sie kennen? Ohne Antwortvorgaben, Mehrfachnennungen möglich

### **Szenarios: Wie würden Sie sich verhalten?**

8) Szenario 1: Es ist Samstagmittag. Bei Ihnen treten plötzlich starke Kopfschmerzen auf. Solche Kopfschmerzen hatten Sie noch nie. Was würden Sie tun? Mehrfachnennungen möglich

- a. Schmerztablette einnehmen
- b. Familie oder Bekannte um Rat fragen
- c. Am Montag beim Hausarzt anrufen und einen Termin vereinbaren
- d. Den Ärztlichen Bereitschaftsdienst anrufen
- e. Zu einem Notdienst des Ärztlichen Bereitschaftsdienstes fahren
- f. Am Montag beim Neurologen anrufen und einen Termin vereinbaren
- g. Die Notrufnummer 112 anrufen

9) Szenario 2: Sie sind auf dem Weg zu einem wichtigen Termin. An einer Bushaltestelle liegt eine offensichtlich verwahrloste Person mit geschlossenen Augen am Boden. Die Person reagiert nicht auf Ansprache. Was würden Sie tun? Mehrfachnennungen möglich

- a. Versuchen wachzurütteln und zu fragen, ob dringend medizinische Hilfe benötigt wird. Wenn ja, dann die Notrufnummer 112 anrufen
- b. Andere Passanten ansprechen, um gemeinsam etwas zu tun und dann notfalls die 112

anrufen

- c. Einmal vorsichtshalber die 112 anrufen und dann die Anweisungen befolgen
- d. Weitergehen und die 112 anrufen, damit ich zumindest Bescheid gegeben habe
- e. Nichts tun, vermutlich schläft die Person und ist in der Haltestelle ja vor Witterung geschützt.
- f. Gar nichts tun, nicht ansprechen und auch wegen so etwas keinen Notruf wählen, den man hört ja so viele schlimme Geschichten
- g. Nichts tun, ich bin für so etwas nicht geeignet und es kommen genug andere Passanten vorbei

10) Szenario 3: Seit Wochen geht ein grippaler Infekt durch Ihren Freundes und Bekanntenkreis. Am Sonntagmorgen merken Sie, dass es Sie auch erwischt hat mit hohem Fieber, Gliederschmerzen und Schnupfen. Was würden Sie tun?

- a. Am Montag zum Hausarzt gehen
- b. Zur Notapotheke gehen und Medikamente besorgen
- c. Familie oder Bekannte um Rat fragen
- d. Den Ärztlichen Bereitschaftsdienst anrufen
- e. Am Montag beim HNO-Arzt anrufen und einen Termin vereinbaren
- f. Zu einer Notdienstpraxis des ärztlichen Bereitschaftsdienstes fahren
- g. Zu einem Krankenhaus fahren
- h. Die Notrufnummer 112 anrufen

### Weitere Fragen

11) Eine Ihnen nahestehende Person ist seit geraumer Zeit zunehmend traurig, in sich gekehrt und ängstlich. Nun gibt die Person an Stimmen zu hören und Panik zu haben. Wo können Sie im Notfall Hilfe bekommen? (ohne Antwortvorgaben, Mehrfachnennungen möglich)

12) Was meinen Sie, gibt es in Ihrem Familien- oder Bekanntenkreis Personen, die Schwierigkeiten haben, sich in unserem Gesundheitssystem zurechtzufinden, also zum Beispiel nicht wissen, an wen sie sich bei gesundheitlichen Problemen wenden können?

☐ Ja, solche Personen gibt es

☐ Nein
