# Supplementary material for: „Warum wird der Notruf 112 gewählt?“ – Befragung zum Notrufverhalten der Berliner Bevölkerung
Source: Springer Nature journal article supplement (doi:10.1007/s10049-021-00954-1), 2021-11-03
Supplement: MOESM2 [file 19826790]

Zusatzmaterial zum Beitrag „Warum wird der Notruf 112 gewählt?“ – Befragung zum Notrufverhalten der Berliner Bevölkerung“ von Dahmen J, Brettschneider P, Poloczek S et al. (2021) in *Notfall+Rettungsmedizin*.

Beitrag und Zusatzmaterial stehen Ihnen auf [www.springermedizin.de](http://www.springermedizin.de) zur Verfügung. Bitte geben Sie dort den Beitragstitel in die Suche ein.

## Leitfaden Experteninterview

### Angaben zur Person

- Beschreiben Sie kurz Ihre Aufgabe(n).

### Einschätzung der Notruf-Situation

- In Deutschland wie auch im Rest der westlichen Länder wird in den letzten 10 bis 15 Jahren ein Anstieg der Notrufe beobachtet. Wie schätzen Sie persönlich die Entwicklung der Notrufsituation ein? (Bitte unterscheiden Sie persönliche Erfahrungen und Erfahrungen/Einschätzungen Dritter.)
- Welche Gründe gibt es Ihrer Meinung nach für die veränderte Notrufsituation (in Berlin oder Ihrem Zuständigkeitsbereich)?
- Inwiefern halten Sie den Anstieg von Notrufen in Berlin bzw. anderen europäischen Großstädten in absehbarer Zeit für umkehrbar?
